# Supplementary material for: Comparison of conditioning factor classification criteria in large-scale statistically based landslide susceptibility models
Source: Copernicus journal article supplement (doi:10.5194/nhess-25-183-2025), 2025-01-07
Supplement: Supplementary file 1 [file nhess-25-183-2025-supplement.pdf]

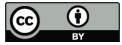

*Supplement of*

## **Comparison of conditioning factor classification criteria in large-scale statistically based landslide susceptibility models**

**Marko Sinčić et al.**

*Correspondence to:* Marko Sinčić (msincic@rgn.hr)

The copyright of individual parts of the supplement might differ from the article licence.

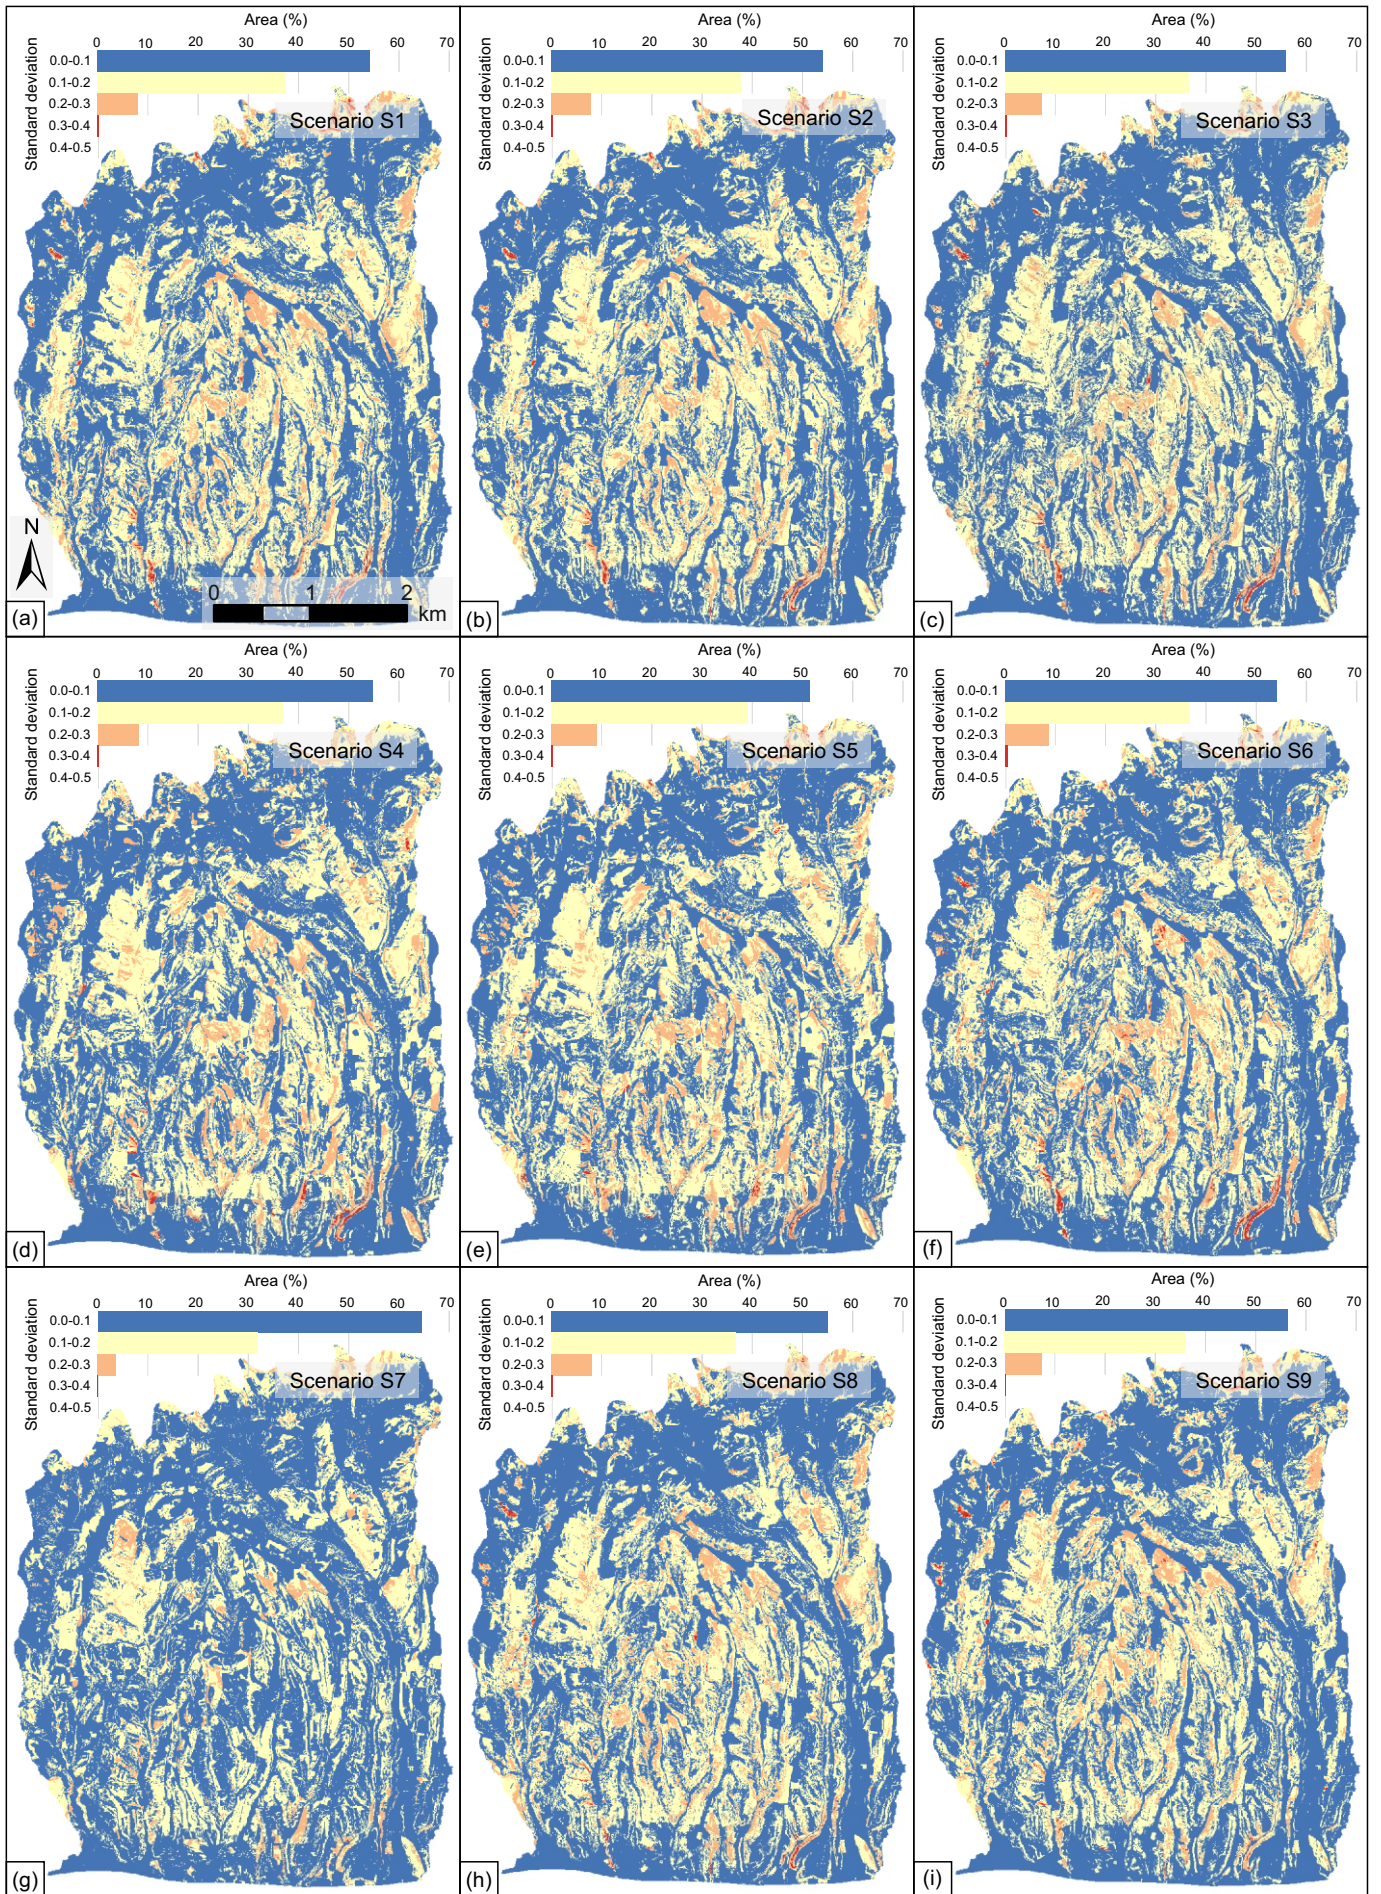

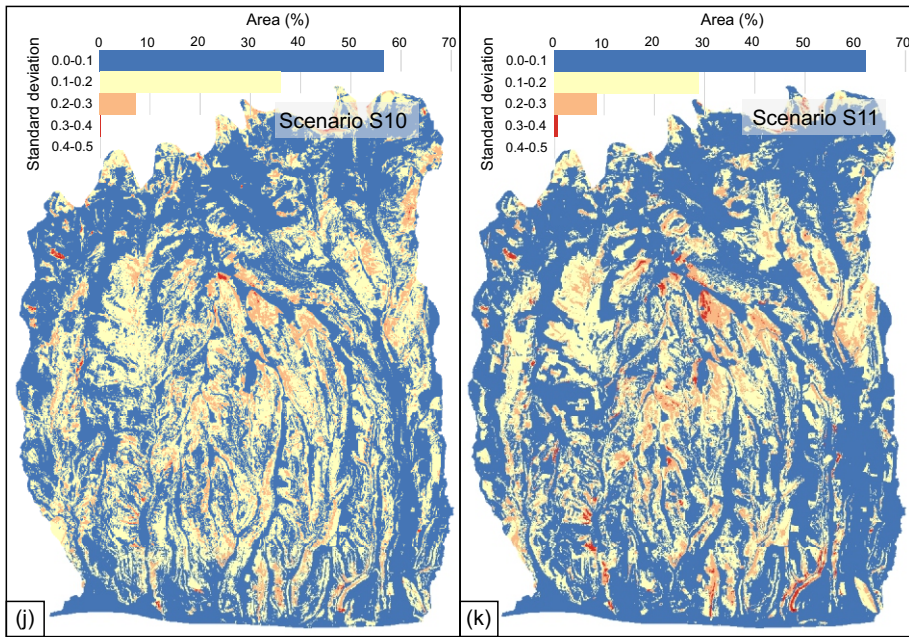

**Figure S1** Standard deviation maps and class area distribution defined through five statistically based methods for each scenario (i.e. scenarios S1 to S11)

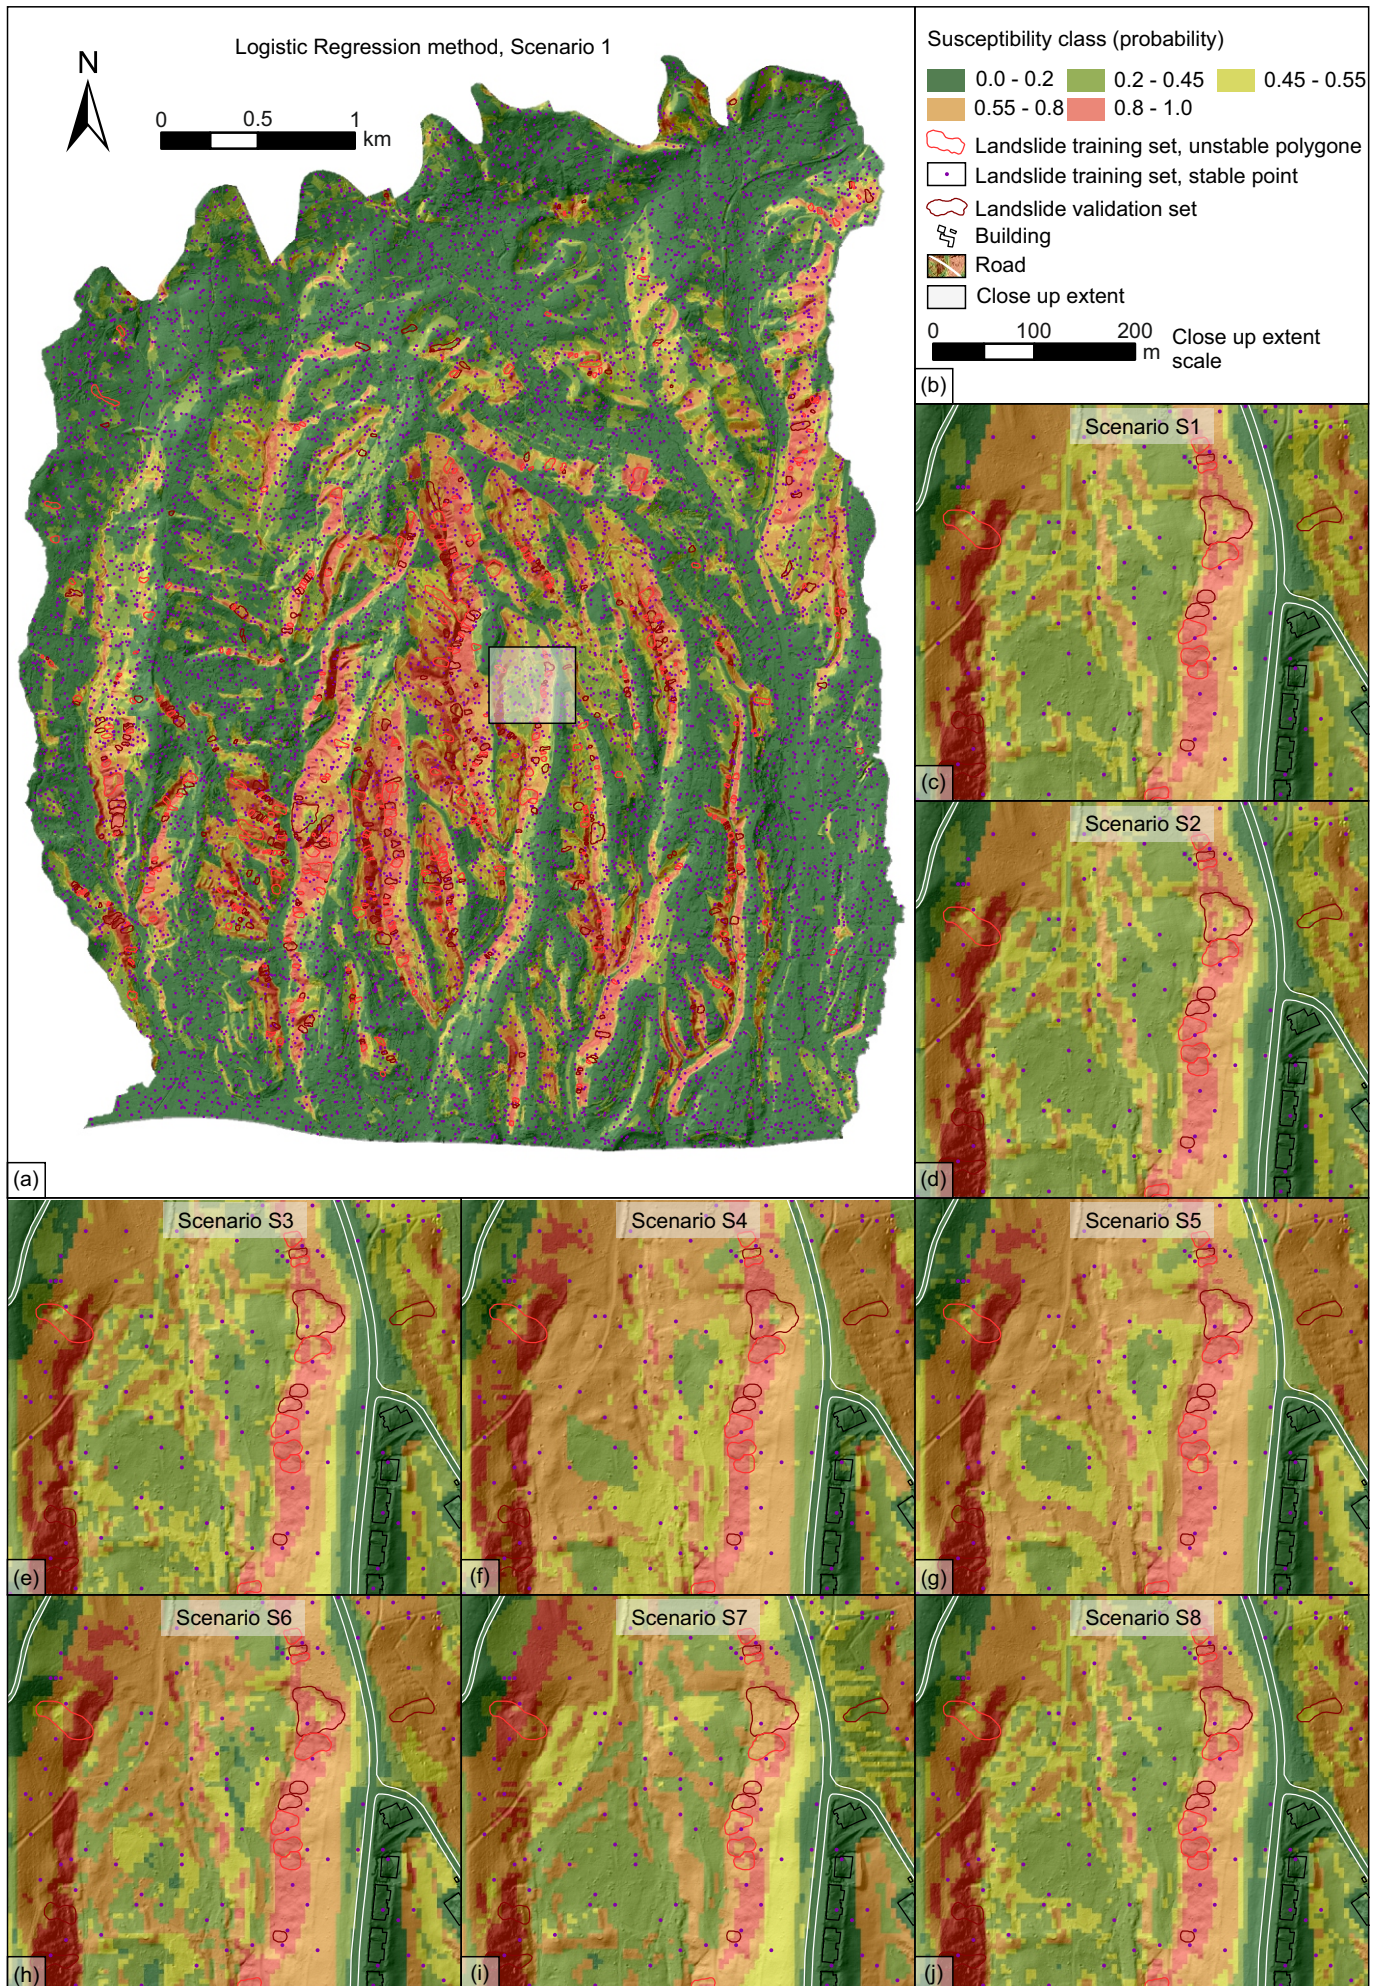

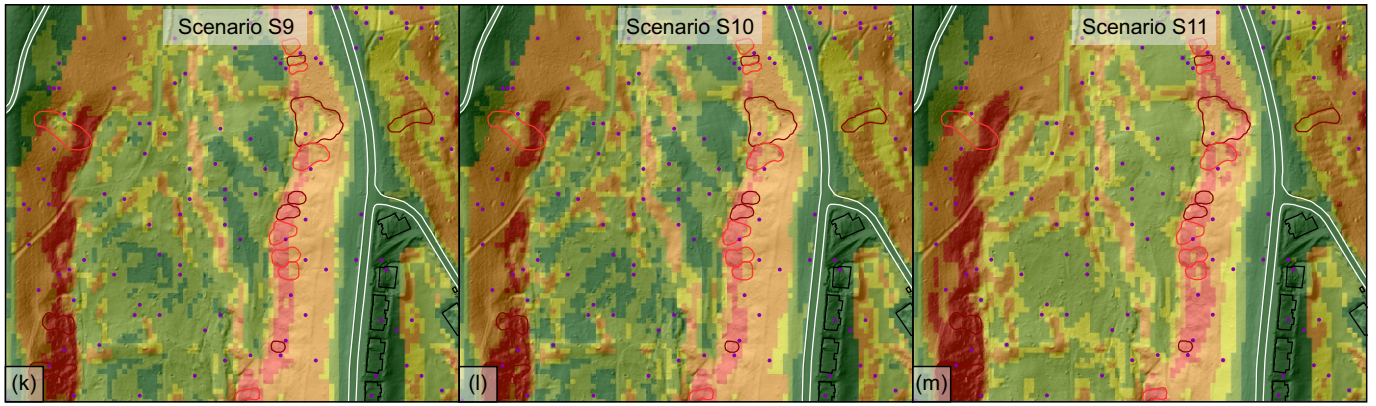

**Figure S2** Landslide susceptibility maps derived using logistic regression method: (a) scenario 11 study area view; (b) legend; (c) to (m) close up view for S1 to S11 scenarios

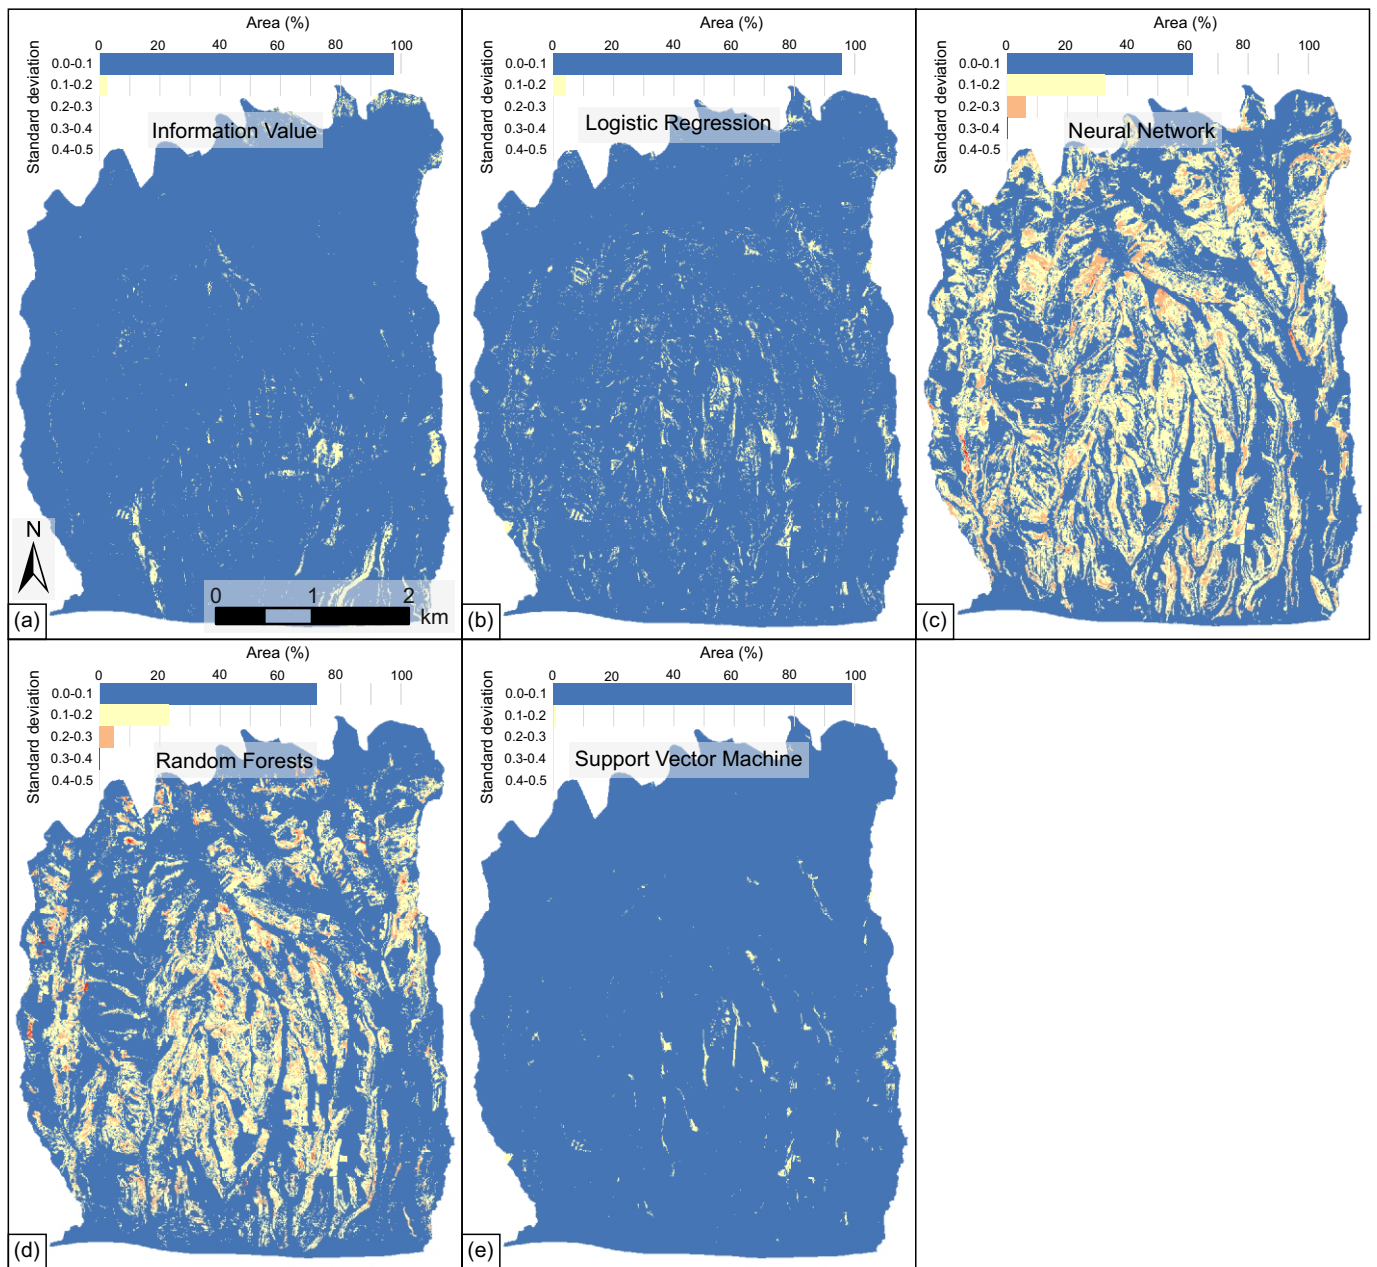

**Figure S3.** Standard deviation maps and class area distribution defined through 11 scenarios for each method, i.e. IV (a), LR (b), NN (c), RF (d), SVM (e)

Information Value (IV) method,  
Scenario 1

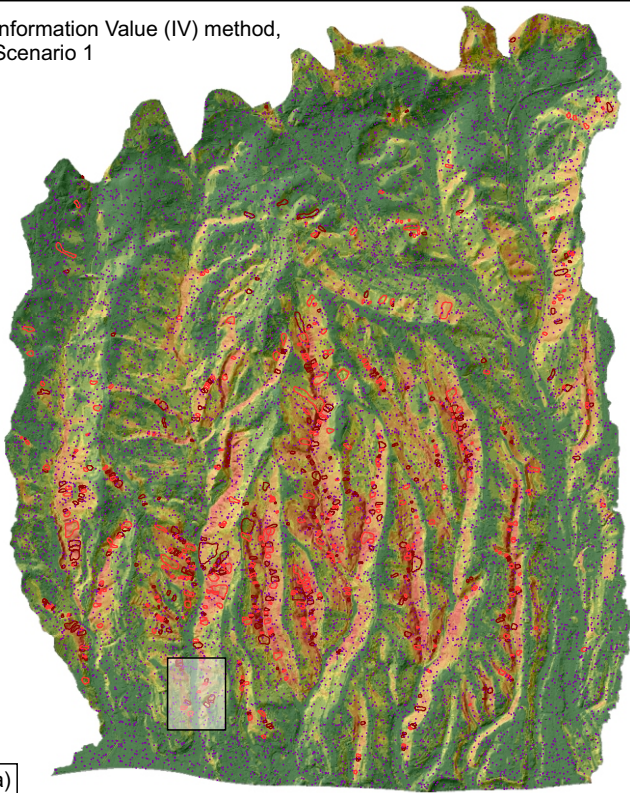

(a)

Neural Network (NN) method,  
Scenario 1

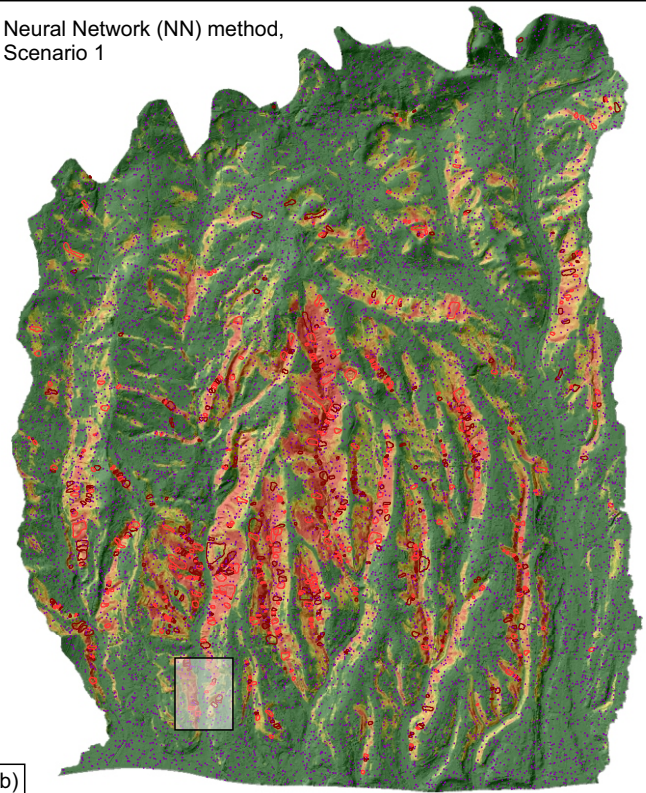

(b)

Random Forests (RF) method,  
Scenario 1

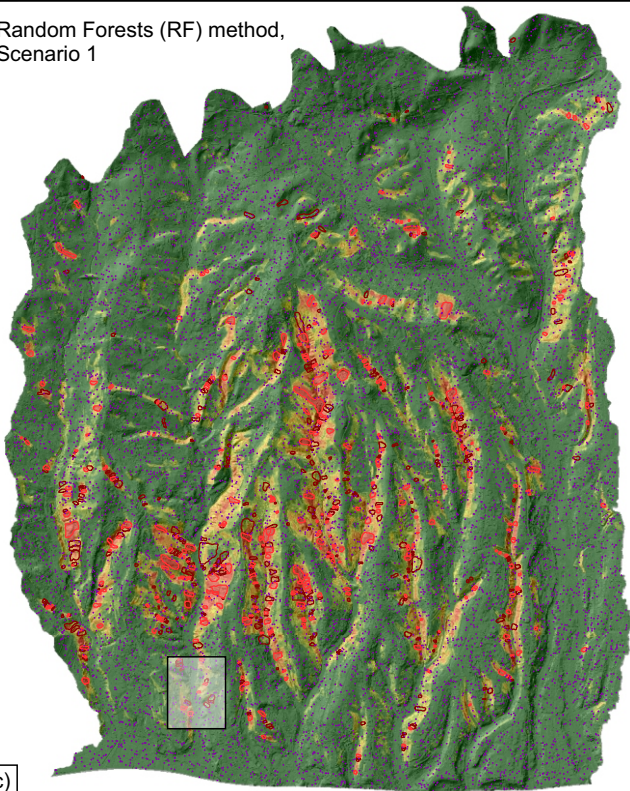

(c)

Support Vector Machine  
(SVM) method,  
Scenario 1

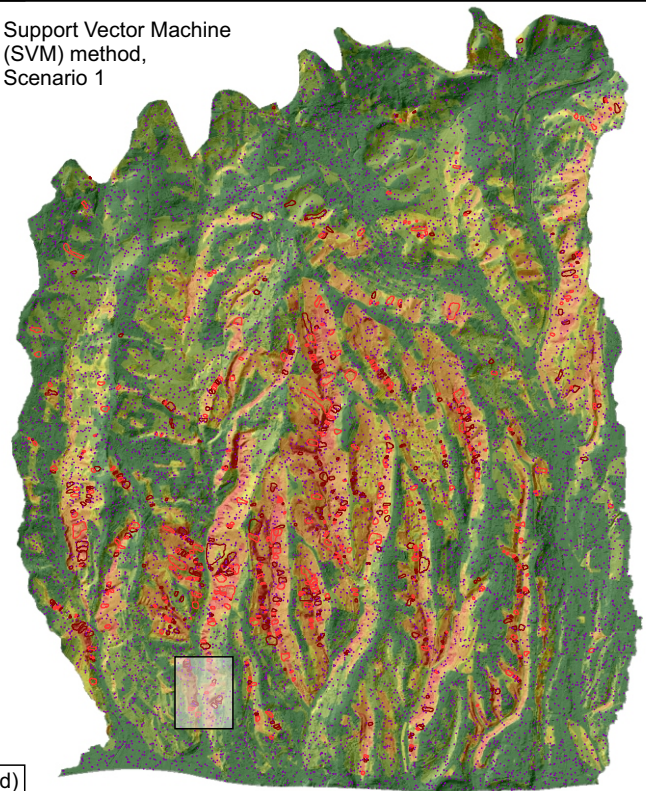

(d)

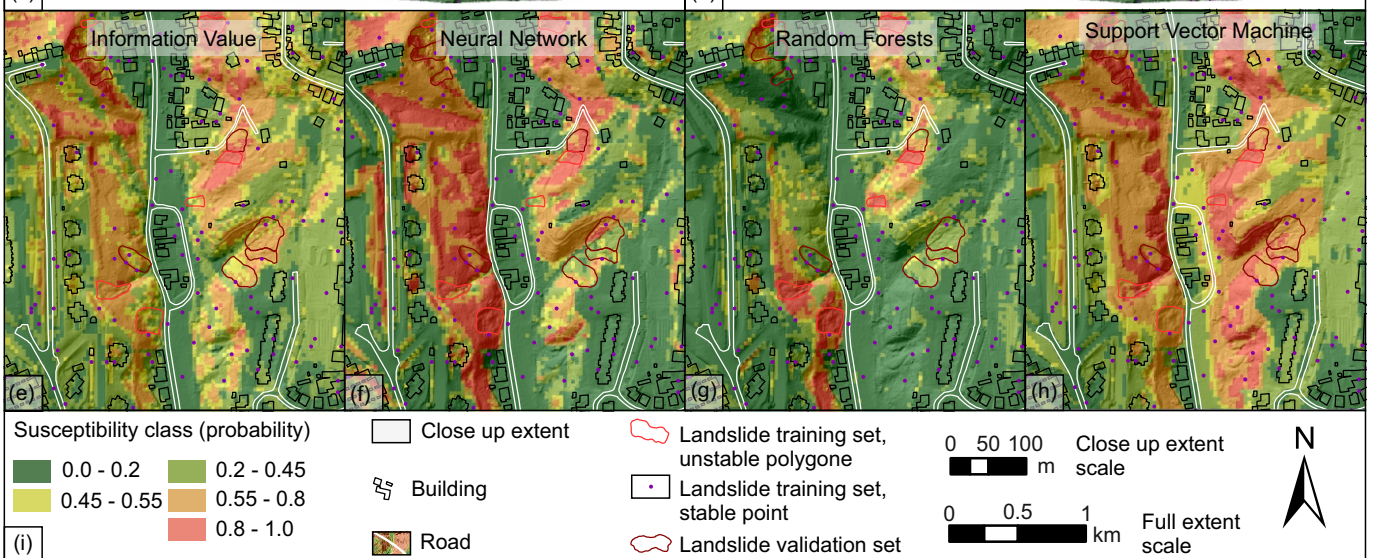

(i)

**Figure S4** Landslide susceptibility maps derived in scenario S1: (a) Information Value method, study area view and (e) close up view; (b) Neural Network method, study area view and (f) close up view; (c) Random Forests method, study area view and (g) close up view; (d) Support Vector Machine method, study area view and (h) close up view; (i) legend
